# Supplementary material for: Clinical and Functional Characteristics of Patients with Unclassifiable Interstitial Lung Disease (uILD): Long-Term Follow-Up Data from European IPF Registry (eurIPFreg)
Source: PubMed Central journal article supplement (PMC7464480; doi:10.3390/jcm9082499), 2020-08-03
Supplement: jcm-09-02499-s001.pdf [file jcm-09-02499-s001.pdf]

Supplementary figures:

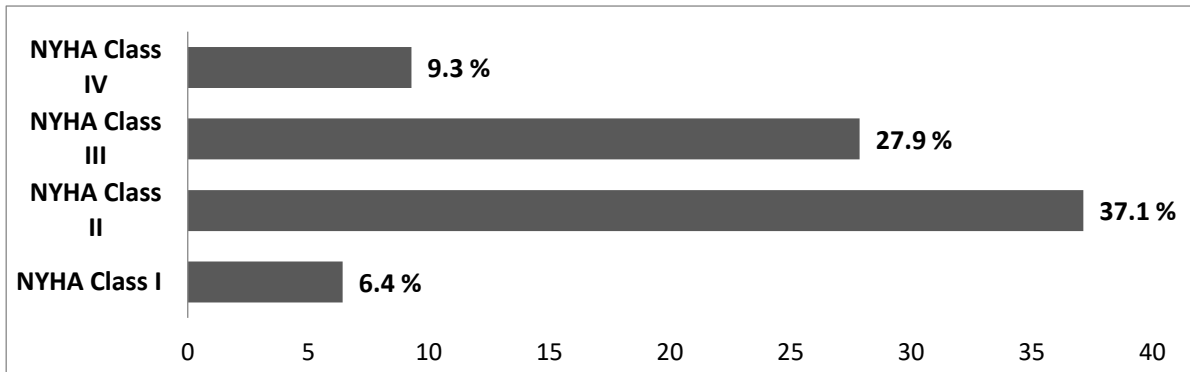

**Supplementary Figure 1. Severity of dyspnea and impairment of physical activity (NYHA I-IV) in uILD cohort at baseline.** The data are presented as percentage of all uILD patients. Abbreviations: NYHA- New York Heart Association.

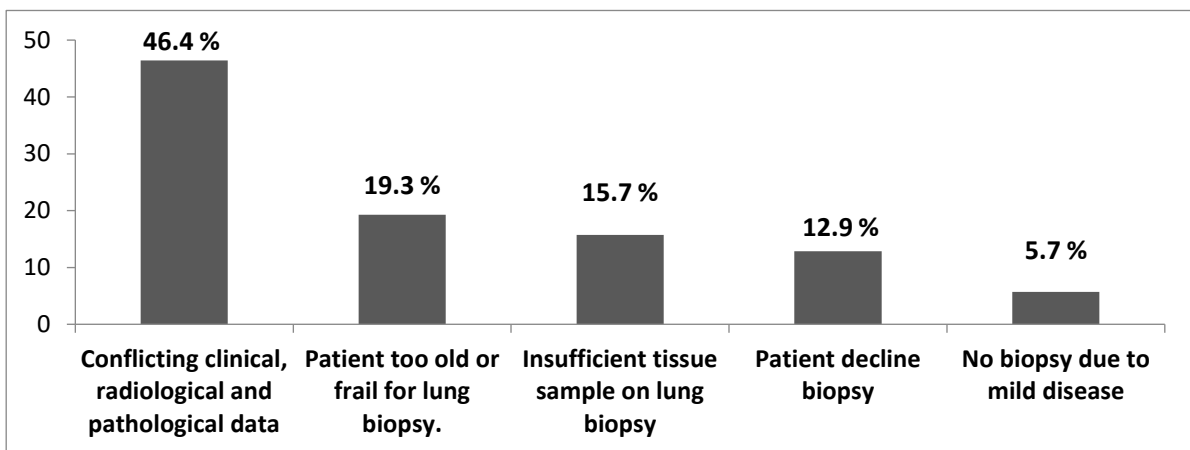

**Supplementary Figure 2. Underlying reasons for the diagnosis of uILD.** Data are presented as percentage of all uILD patients.

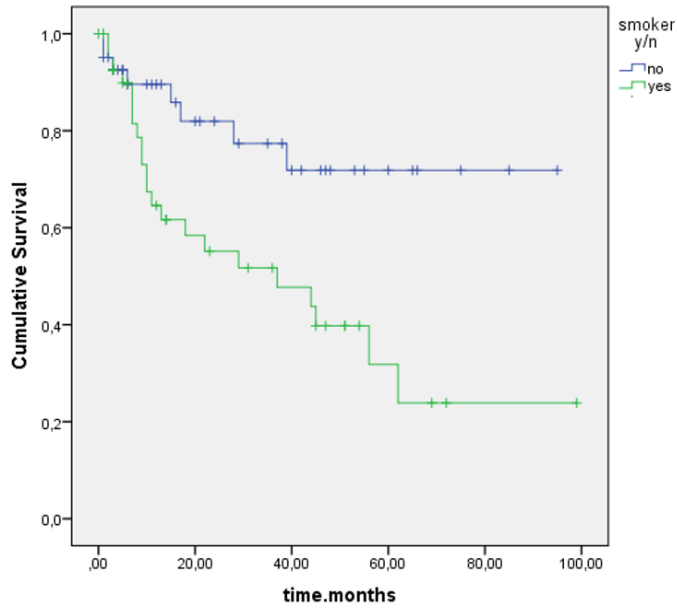

**Supplementary Figure 3. Cumulative survival and smoking status (p=0.008)**

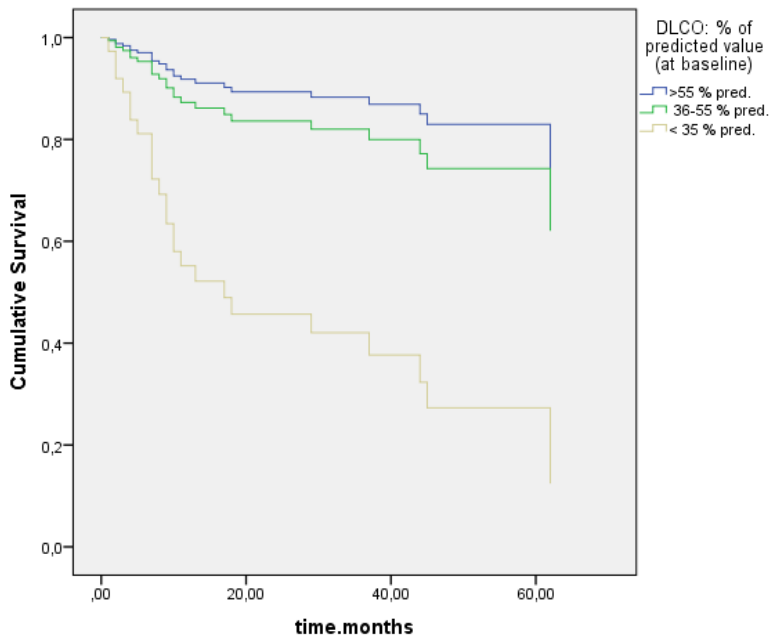

**Supplementary Figure 4. Cumulative survival and DLCO % pred. at baseline (p<0.0001).**

Abbreviations: DLCO- diffusing capacity of the lung for carbon monoxide.

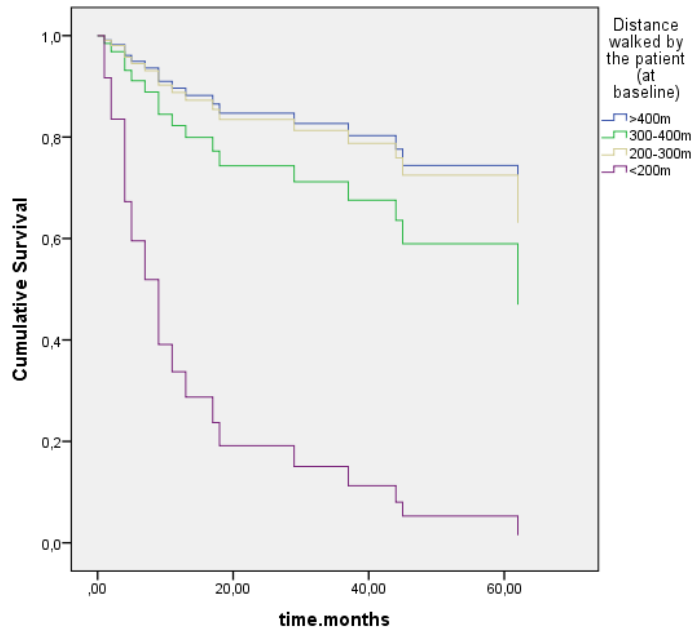

**Supplementary Figure 5. Cumulative survival and 6MWD at baseline ( $p < 0.0001$ ).** Abbreviations: 6MWD- six minutes walking distance, m-meters.

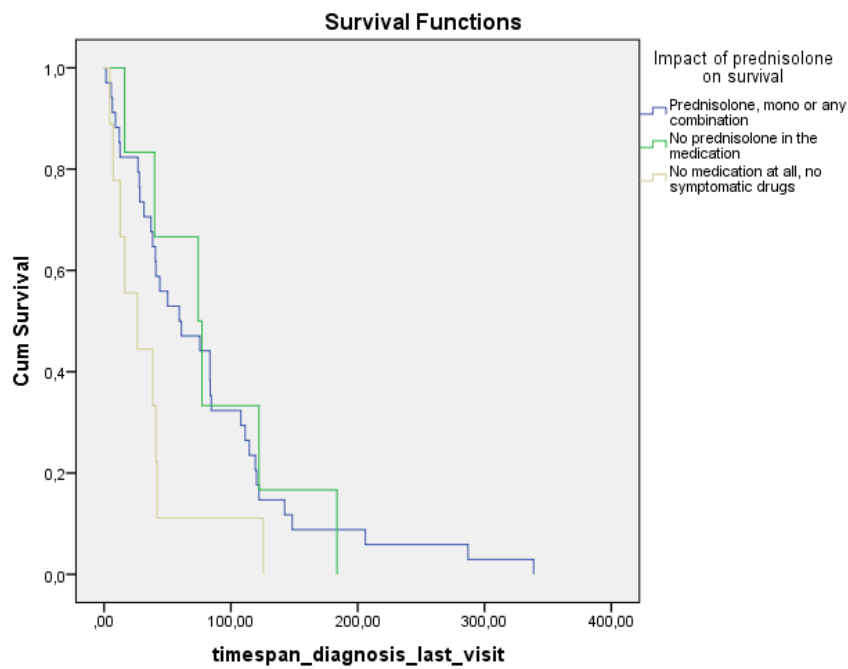

**Supplementary Figure 6. Impact of prednisolone on survival in uILD ( $p = 0.094$ ).**

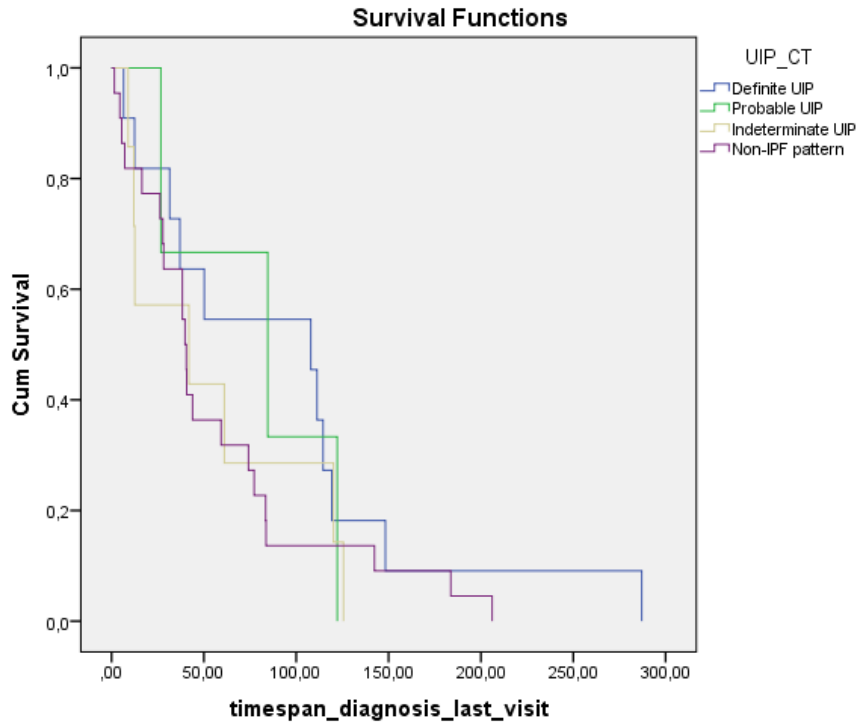

**Supplementary Figure 7. Impact of UIP pattern in High-resolution CT (Fleischner Society Criteria) on survival in uILD (p=0.604).** Abbreviations: UIP- usual interstitial pneumonia, CT- Computed Tomography, IPF- idiopathic pulmonary fibrosis.
